# Supplementary material for: Recombination reduction on lead halide perovskite solar cells based on low temperature synthesized hierarchical TiO2nanorods
Source: Royal Society of Chemistry journal article supplement (doi:10.1039/c5nr06692a), 2015-11-16
Supplement: c5nr06692a1.pdf [file c5nr06692a1.pdf]

## SUPPORTING INFORMATION

### **Recombination Reduction on Lead Halide Perovskite Solar Cells based on Low Temperature Synthesized Hierarchical TiO<sub>2</sub> Nanorods**

**Oscar A. Jaramillo-Quintero,<sup>1,2</sup> Mauricio Solís de la Fuente,<sup>1</sup> Rafael S. Sanchez,<sup>1</sup> Ileana B. Recalde,<sup>1</sup> Emilio J. Juarez-Perez,<sup>1</sup> Marina Rincon,<sup>2,\*</sup> and I. Mora-Seró<sup>1,\*</sup>**

<sup>1</sup> Institute of Advanced Materials (INAM), Universitat Jaume I, 12006 Castelló, Spain.

<sup>2</sup> Instituto de Energías Renovables, Universidad Nacional Autónoma de México, Apartado Postal 34, Temixco, Mor., México 62580.

\* Corresponding authors: [merg@ier.unam.mx](mailto:merg@ier.unam.mx), [sero@uji.es](mailto:sero@uji.es)

#### **Experimental section**

##### FTO substrates pretreatment

Firstly, the FTO layer (Pilkington TEC15, 15  $\Omega$ /sq resistance) was partially etched with zinc powder and HCl (2 M) to prevent short circuit, cleaned by hand with soap and deionized water, followed by sonication in a mixture 2-propanol/acetone/ethanol (1:1:1 v/v) for 15 min. The cleaned FTO substrates were further treated with UV-O<sub>3</sub> for 20 min.

##### TiO<sub>2</sub> nanorod films

TiO<sub>2</sub> NRs were prepared using hydrothermal method as reported elsewhere.<sup>1</sup> Briefly, 1 mL of titanium (IV) isopropoxide was added drop by drop into a mixture of DI water (25 mL) and HCl (25 mL), kept under vigorously stirring to obtain a transparent solution. The solution was transferred to a Teflon liner of an autoclave where the FTO substrates have been positioned. The hydrothermal method was conducted at 180 °C for different growth time 110, 120, 125 and 130 min to obtain TiO<sub>2</sub> NR lengths of 380, 540, 700 and 1100 nm, respectively. After the synthesis, the FTO substrate was taken out, rinsed with DI water and dried in air at 50 °C.

##### 3D TiO<sub>2</sub> hierarchical nanorod films

3D TiO<sub>2</sub> hierarchical nanostructures were synthesized by a second hydrothermal method using the as prepared TiO<sub>2</sub> NR films as seeds. Typically, 2.4 mL of deionized water was slowly dropped into a mixture of dichloromethane (20 mL) and TiCl<sub>4</sub> (0.4 mL) at 0°C. Again, the solution was placed in a Teflon liner with the as prepared TiO<sub>2</sub> NR on the FTO substrate and set in an electric oven at 180 °C for 2 h. After the hydrothermal

reaction, the TiO<sub>2</sub> 3D HNR on FTO substrate was finally washed with ethanol and DI water, respectively, and then dried in an oven at 60 °C.

#### TiO<sub>2</sub> compact layer films

TiO<sub>2</sub> compact layer films were used in control devices. It was deposited on the FTO substrates by spray pyrolysis at 450 °C using a diluted solution of titanium diisopropoxide bis(acetylacetonate) solution (75% in 2-propanol) in ethanol (1:39 v/v) and compressed oxygen as carrier gas. After spraying the precursor solution, the substrates were sintered on a hot plate for 30 min at 450 °C and then cooled down to ambient temperature.

#### Perovskite solar cells fabrication

CH<sub>3</sub>NH<sub>3</sub>PbI<sub>3</sub> (Sing-MAI) was synthesized using two different methods broadly extended in the literature. On one hand, single step method using PbCl<sub>2</sub> precursor. Following the most used literature nomenclature we have call this perovskite CH<sub>3</sub>NH<sub>3</sub>PbI<sub>3-x</sub>Cl<sub>x</sub>, despite the amount of Cl is significantly low under the detection limit in many cases. For this synthesis, 100 μL of precursor solution prepared by adding 1 mL of anhydrous DMF into a mixture of CH<sub>3</sub>NH<sub>3</sub>I (0.423 g) and PbCl<sub>2</sub> (0.246 g), was spin-coated through one-step deposition route onto the three TiO<sub>2</sub> structures films inside the glove box at different spin rates (from 1000 to 4000 r.p.m.) for 60 s. Then, the films were putted on a hot plate for 30 min at 100 °C, followed by annealing at 100 °C for an additional hour in an oven under air flow. The CH<sub>3</sub>NH<sub>3</sub>I was prepared in our laboratory by following standard procedures.<sup>2</sup>

On the other hand, CH<sub>3</sub>NH<sub>3</sub>PbI<sub>3</sub> perovskite layer (Seq-MAI) was deposited by two-steps sequential method.<sup>3</sup> In brief, 20 μL of PbI<sub>2</sub> solution prepared by dissolving PbI<sub>2</sub> (462 mg) in 1 mL of anhydrous DMF under stirring at 70 °C, was spin-coated on the different TiO<sub>2</sub> films at 3000 r.p.m. for 5 s and 6000 r.p.m. for 5 s. After spinning, the film was dried at 40 °C for 3 min and 100 °C for 5 min, and cooled down to ambient temperature. Then, the film was immersed in a 2-propanol solution containing CH<sub>3</sub>NH<sub>3</sub>I (0.04 M) and dried at 100 °C for 5 min. All deposition steps were carried out inside the glove box.

Hole transport material solution consisting of 72.3 mg Spiro-OMeTAD (2,2',7,7'-tetrakis(N,N-di-p-methoxyphenylamine)-9,9-spirobifluorene) in 1 mL of chlorobenzene was prepared. Then, the solution was mixed with 28.8 μl of 4-tert-butylpyridine and 17.5 μL of a stock solution of 520 mg/mL bis(trifluoromethylsulfonyl)amine lithium salt and spin-coated onto the perovskite layers at 4000 r.p.m. for 30 s under air conditions. Finally, the PSCs were completed by thermal evaporation of 60 nm of gold counter electrode.

#### Characterization of nanorods, hierarchical nanorods and perovskite solar cells

The film morphologies, TiO<sub>2</sub> NR and HNR branches lengths and layer thicknesses were examined with a Field Emission Scanning Electron Microscopy using a Hitachi S4800

(FEG-SEM). The film structure was characterized by X-ray diffraction (XRD) at a grazing angle of  $0.5^\circ$  with a Rigaku Diffractometer (D/MAX 2200) using the  $\text{CuK}\alpha$  ( $\lambda = 1.54 \text{ \AA}$ ) radiation source.

PSCs current density–voltage ( $J$ – $V$ ) curves were recorded by a Keithley 2400 digital source meter and xenon arc lamp simulator (Sun 2000, ABET Technologies) with an AM 1.5G spectral filter. The power density was calibrated to 1 sun illumination ( $100 \text{ mW}\cdot\text{cm}^{-2}$ ) with an NREL-calibrated Si solar cell. All the measurements were performed with a dark mask of  $0.11 \text{ cm}^2$  and without encapsulation. The incident-photon-to-current-efficiency (IPCE) spectra were determined using a xenon lamp power source coupled with a monochromator controlled by a computer. The photocurrent was measured using an Oriel Instruments 70310 optical power meter and a Si photodiode to calibrate the system. Impedance spectroscopy measurements were carried out under illumination conditions and at different applied voltages by means of a FRA equipped PGSTAT-30 from Autolab, by applying a 20 mV voltage perturbation over the constant applied bias with the frequency ranging between 1 MHz and 0.1 Hz.

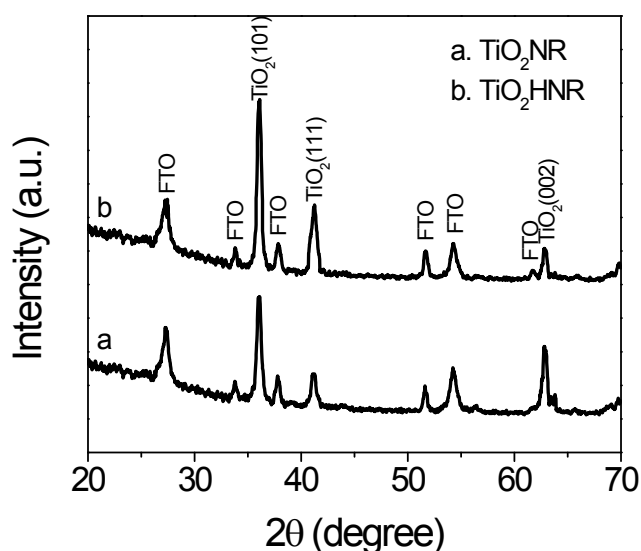

**Figure S1:** XRD patterns of  $\text{TiO}_2$  films grown on FTO glass. (a)  $\text{TiO}_2$  nanorods film. (b)  $\text{TiO}_2$  hierarchical based on nanorods.

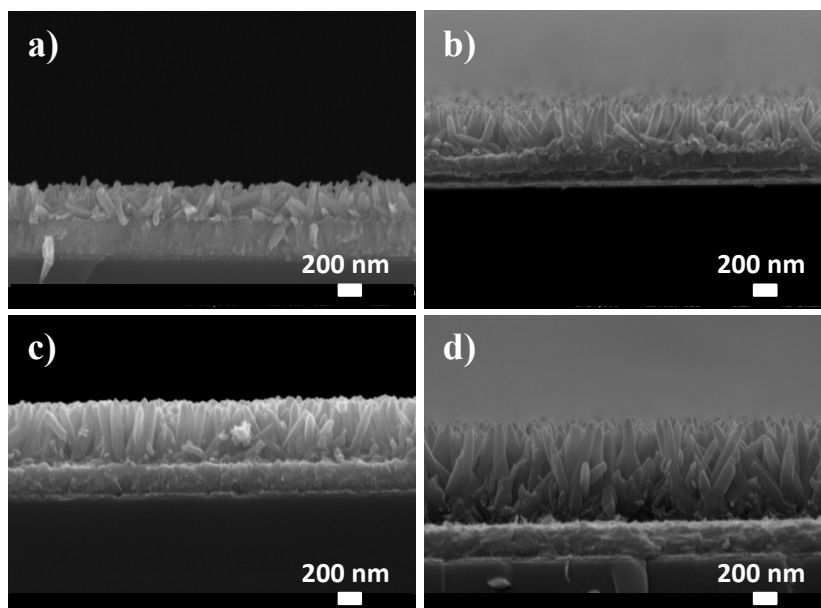

**Figure S2:** FESEM images of the TiO<sub>2</sub> nanorods grown by hydrothermal synthesis, using 25 ml of DI water, 25 ml of HCl and 1 ml of TTIP, at 180 °C for different growth time. a) 110 min (380 nm). b) 120 min (500 nm). c) 125 min (700 nm). d) 130 min (1100 nm).

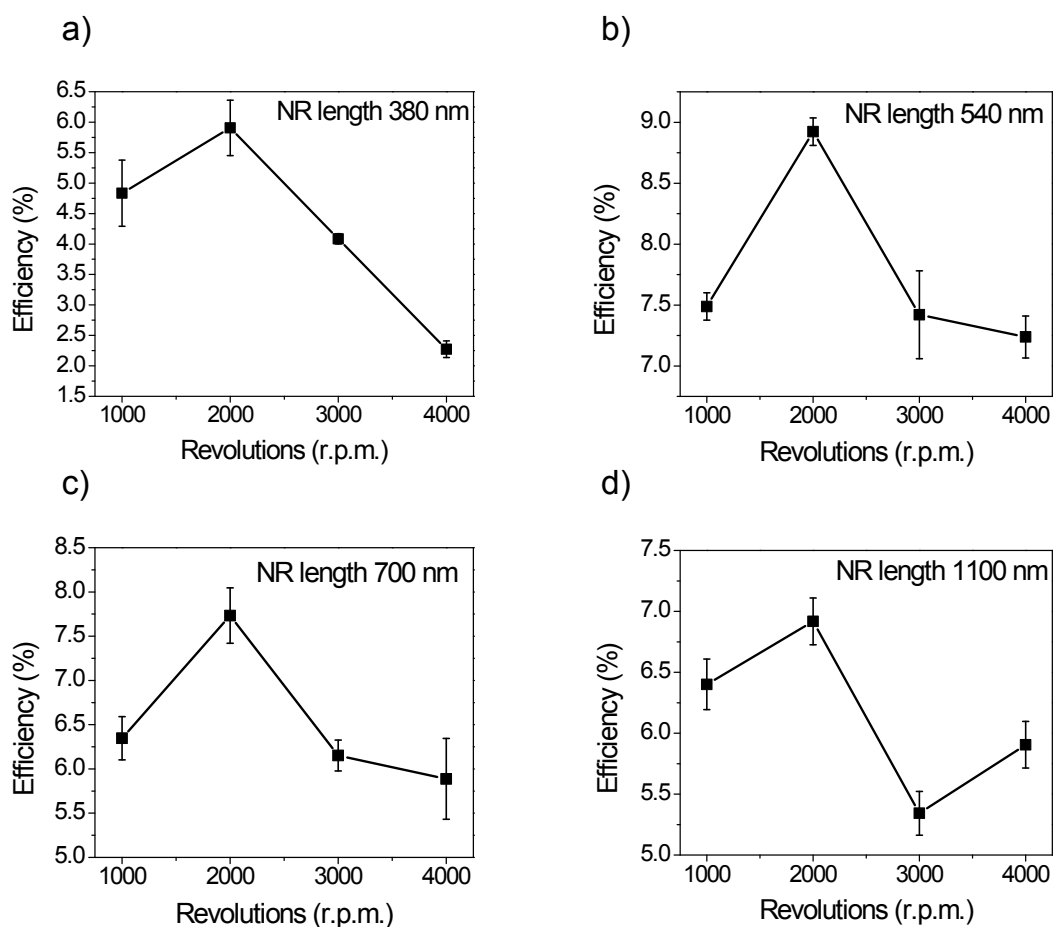

**Figure S3:** PCE values vs. spin rates at a different TiO<sub>2</sub> NR lengths. Error bars correspond to the standard distribution taking into account 10 devices prepared at each condition. (a) 380 nm. (b) 540 nm. (c) 700 nm. (d) 1100 nm.

**Table S1:** Average  $J/V$  curves parameters and standard deviation based on ten NR PSCs at different NR lengths.

| Length (nm) | Jsc (mA/cm <sup>2</sup> ) | Voc (mV)       | FF (%)       | Efficiency (%) |
|-------------|---------------------------|----------------|--------------|----------------|
| 380         | 13.35 ± 0.79              | 807.95 ± 11.19 | 50.98 ± 0.63 | 5.91 ± 0.45    |
| 540         | 17.34 ± 0.15              | 803.91 ± 18.72 | 62.45 ± 0.95 | 8.92 ± 0.18    |
| 700         | 16.48 ± 0.86              | 797.67 ± 19.53 | 58.87 ± 1.51 | 7.73 ± 0.31    |
| 1100        | 15.31 ± 0.11              | 791.31 ± 15.73 | 57.11 ± 0.63 | 6.92 ± 0.22    |

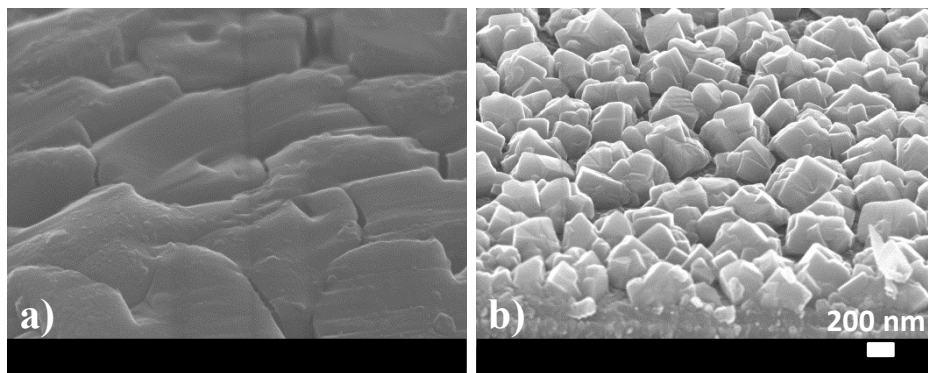

**Figure S4:** FESEM images of TiO<sub>2</sub> surface coverage using a different perovskite layer. a) Sing-MAI b) Seq-MAI.

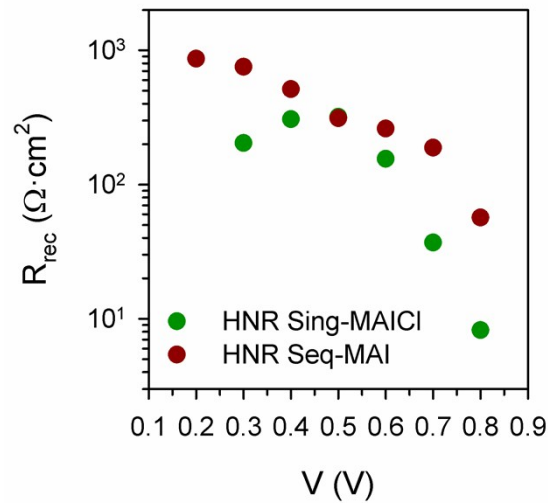

**Figure S5:** Comparison of  $R_{rec}$  for HNR samples using Seq-MAI and Sing-MAI as light harvester.

## References

- 1 H. S. Kim, J. W. Lee, N. Yantara, P. P. Boix, S. A. Kulkarni, S. Mhaisalkar, M. Grätzel, N.-G. Park, *Nano Lett.*, 2013, **13**, 2412–2417.
- 2 M. M. Lee, J. Teuscher, T. Miyasaka, T. N. Murakami and H. J. Snaith, *Science*, 2012, **338**, 643–647.
- 3 J. Burschka, N. Pellet, S.-J. Moon, R. Humphry-Baker, P. Gao, M. K. Nazeeruddin and M. Graetzel, *Nature*, 2013, **499**, 316–319.
